# Supplementary material
Source: PubMed Central journal article supplement (PMC5639483)
Supplement: blood775536-suppl1.pdf [file blood775536-suppl1.pdf]

# Supplementary Figure 1

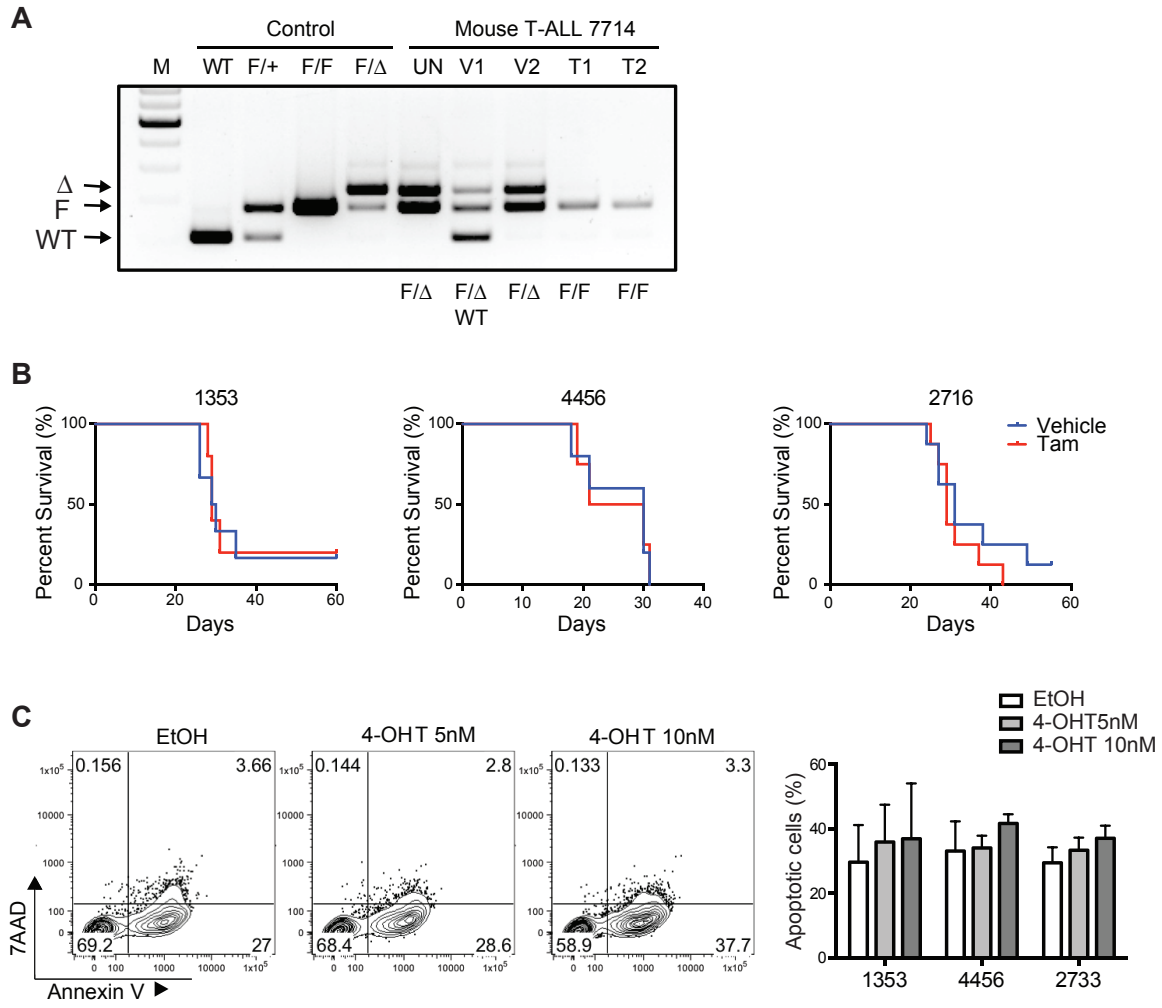

## Supplementary Figure 2

**A**

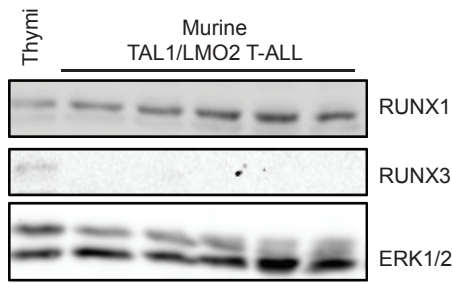

**B**

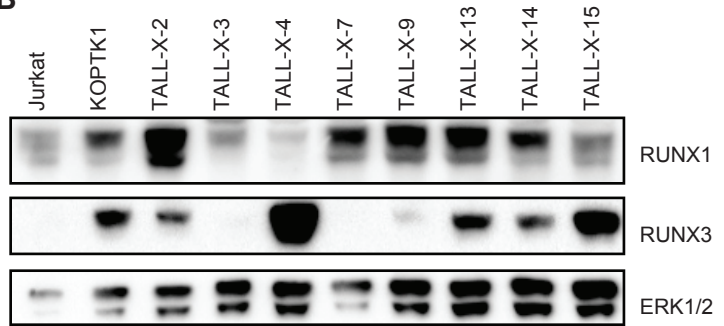

**C**

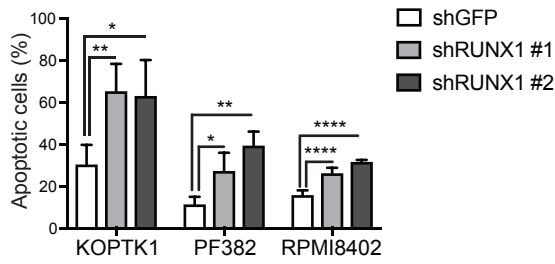

**D**

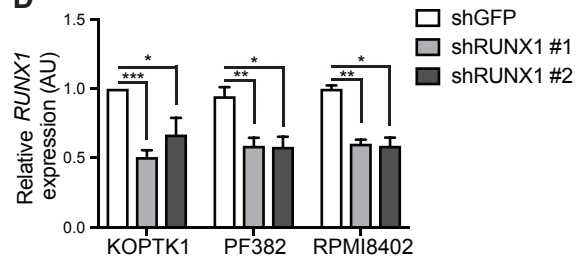

**E**

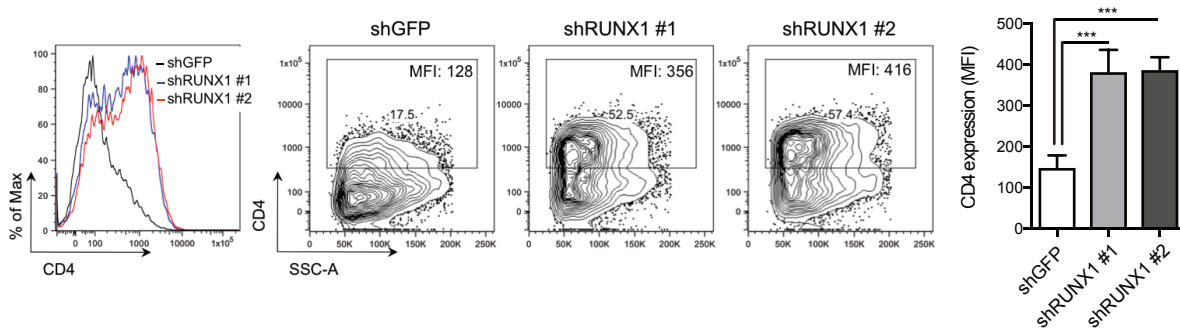

**F**

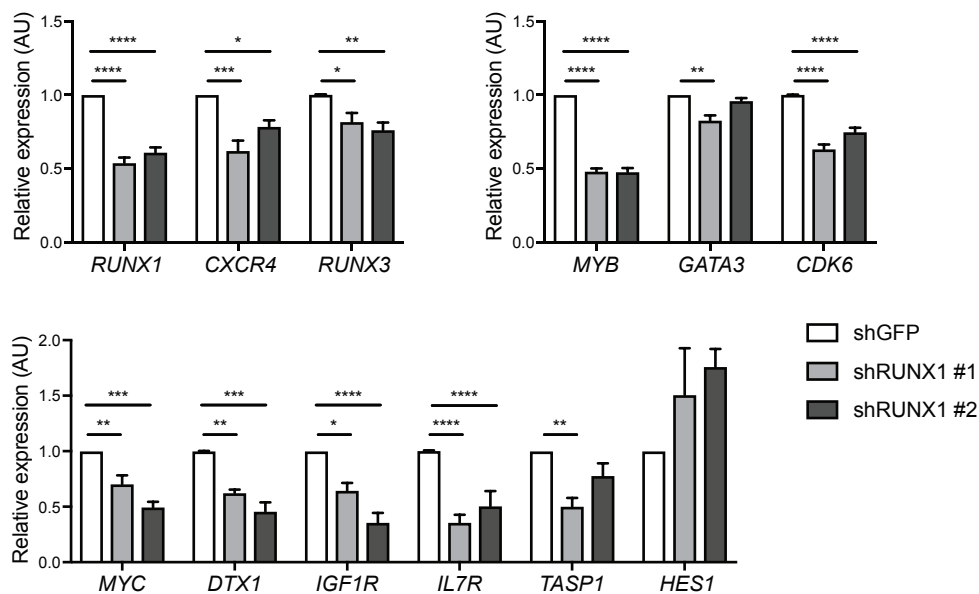

### Supplementary Figure 3

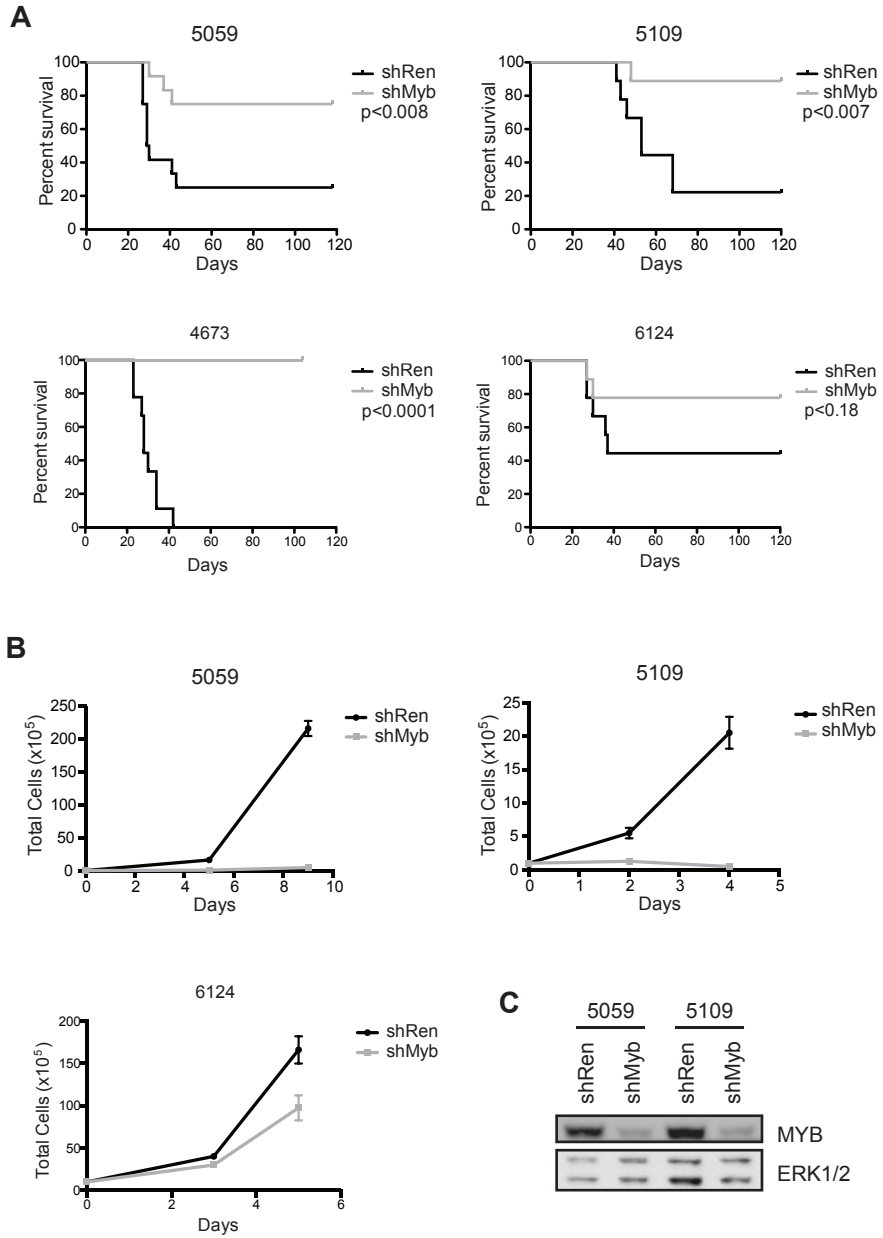

### Supplementary figure 4

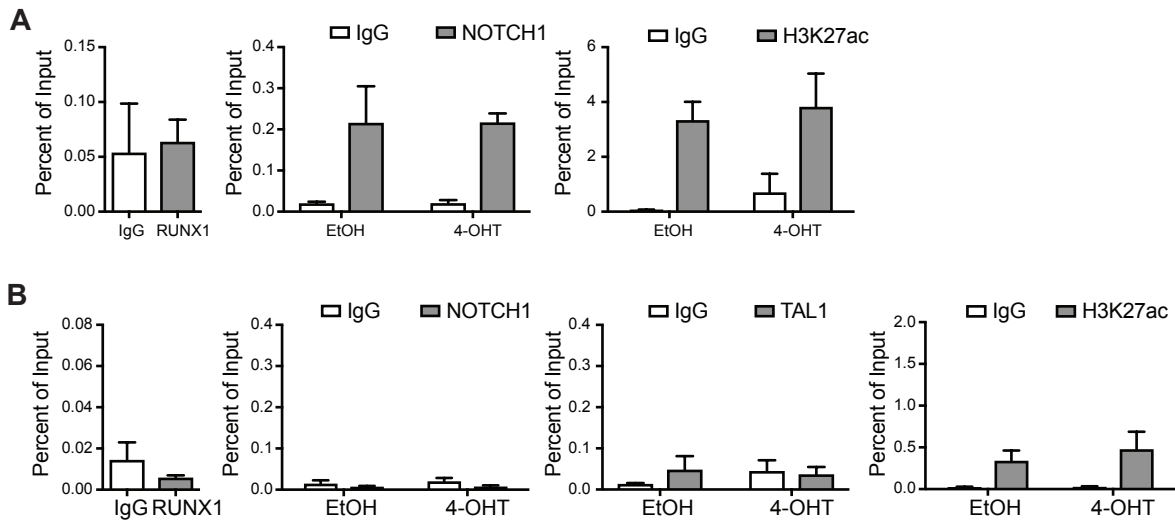

### Supplementary Figure 5

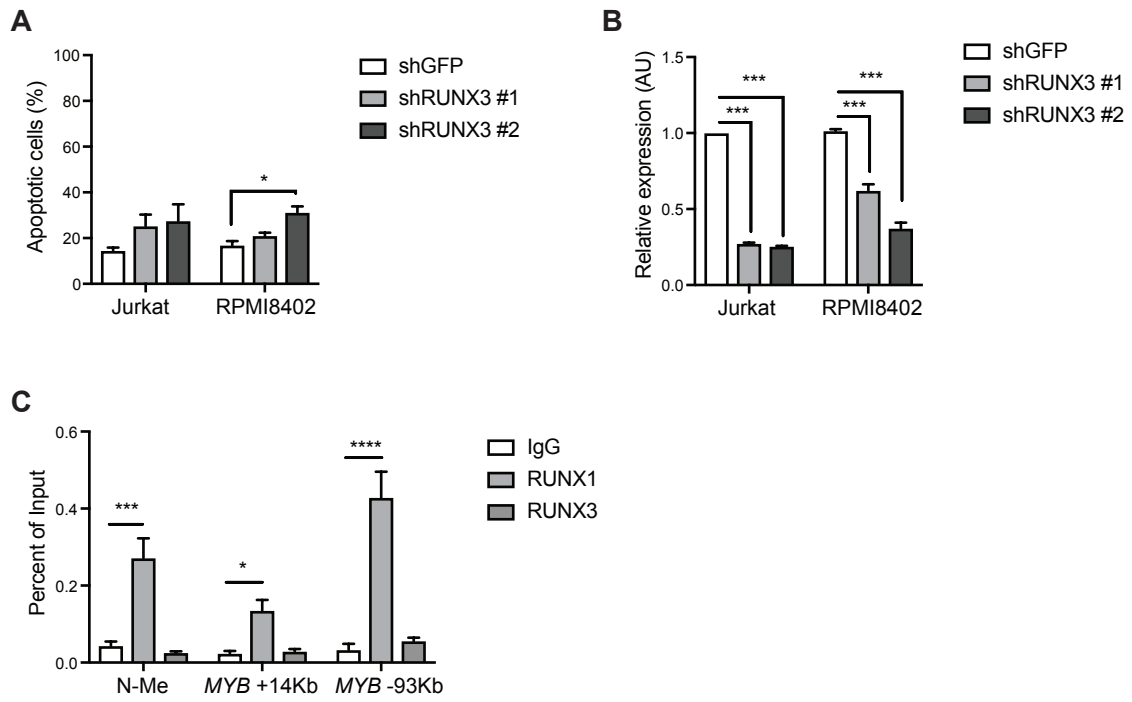

## Supplementary Figure 6

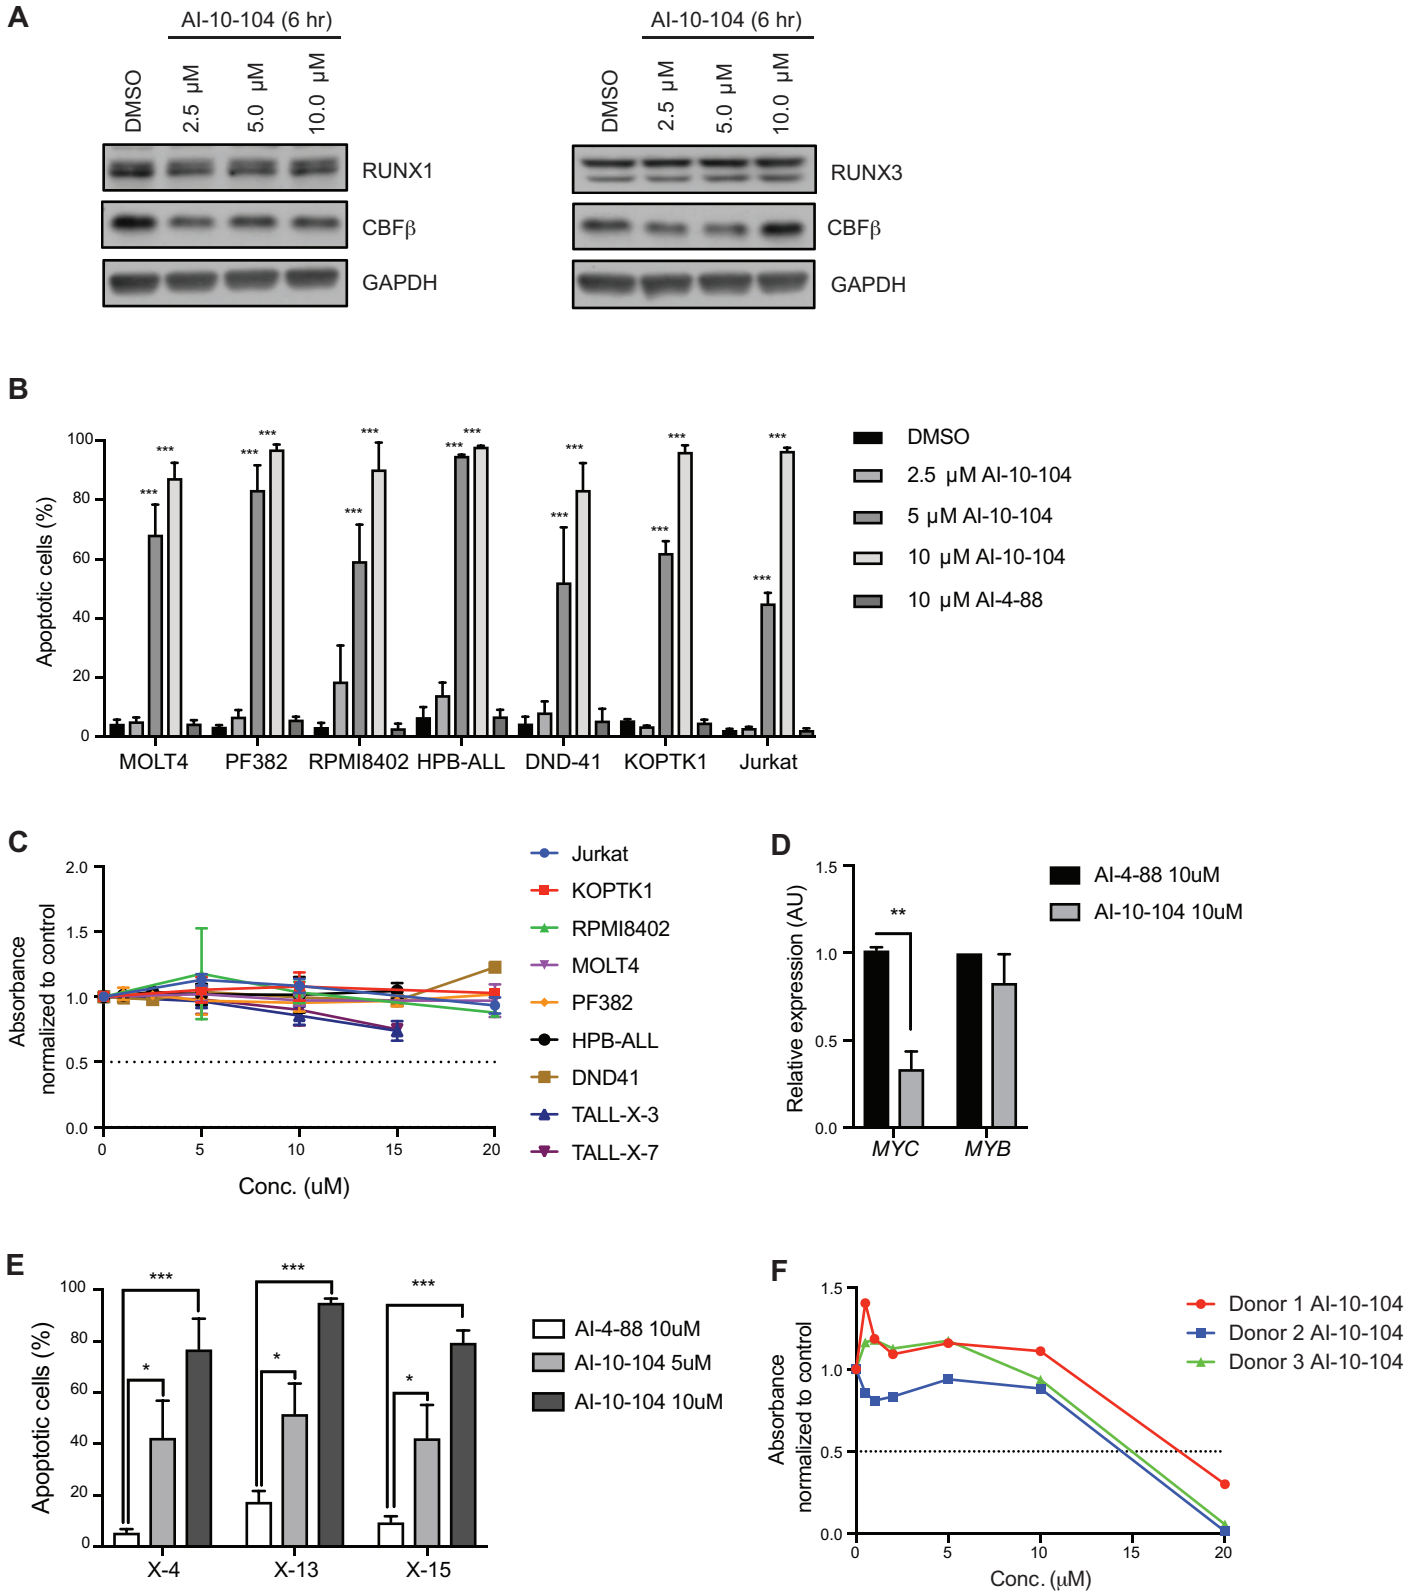

| Sample ID                | GI <sub>50</sub> of AI-10-104 (μM) |
|--------------------------|------------------------------------|
| Donor 1                  | 16.6                               |
| Donor 2                  | 17.04                              |
| Donor 3                  | 12.54                              |
| Average GI <sub>50</sub> | 15.39                              |

**Supplementary Table 1. Expression and mutation status in patient samples and human T-ALL cell lines.**

| <b>Patient samples</b>  |              |                                      |                                                |                        |                      |
|-------------------------|--------------|--------------------------------------|------------------------------------------------|------------------------|----------------------|
|                         | <b>RUNX1</b> | <b>TAL1<br/>detected<sup>†</sup></b> | <b>NICD<br/>detected<sup>†</sup></b>           | <b>NOTCH1</b>          | <b>FBW7</b>          |
| <b>TALL-X-1</b>         | WT           | Yes                                  | No                                             | WT                     | WT                   |
| <b>TALL-X-2</b>         | WT           | Yes                                  | Yes                                            | p.P2514fs,<br>p.F1592S | WT                   |
| <b>TALL-X-3</b>         | WT           | Yes                                  | Yes                                            | p.L1593fs              | WT                   |
| <b>TALL-X-4</b>         | WT           | Yes                                  | Yes                                            | p.F1592S               | WT                   |
| <b>TALL-X-5</b>         | WT           | Yes                                  | Yes                                            | p.L1585P               | WT                   |
| <b>TALL-X-7</b>         | WT           | Yes                                  | Yes                                            | p.L1600P               | p.R479Q              |
| <b>TALL-X-8</b>         | WT           | Yes                                  | Yes                                            | p.R1598P               | p.T450fs,<br>p.R689W |
| <b>TALL-X-9</b>         | WT           | No                                   | Yes                                            | p.R1598P               | WT                   |
| <b>TALL-X-13</b>        | WT           | Yes                                  | Yes                                            | WT                     | WT                   |
| <b>TALL-X-14</b>        | WT           | No                                   | No                                             | WT                     | p.R465H              |
| <b>TALL-X-15</b>        | WT           | Yes                                  | Yes                                            | WT                     | WT                   |
| <b>Human cell lines</b> |              |                                      |                                                |                        |                      |
|                         | <b>RUNX1</b> | <b>RUNX3</b>                         | <b>NOTCH1</b>                                  | <b>FBW7</b>            |                      |
| <b>Jurkat</b>           | p.A122T      | WT                                   | WT                                             | p.R505C                |                      |
| <b>KOPTK1</b>           | N/A          | N/A                                  | p.L1600P, p.P2514fs*4                          | WT                     |                      |
| <b>RPMI8402</b>         | WT           | WT                                   | p.E1583_Q1584insPVELMPPE,<br>p.Q1584>HRGADAAGA | p.R465H                |                      |
| <b>MOLT4</b>            | WT           | WT                                   | p.L1600P, p.P2515fs                            | WT                     |                      |
| <b>PF382</b>            | WT           | WT                                   | p.L1574P, p.P2493fs*>67                        | WT                     |                      |
| <b>HPB-ALL</b>          | WT           | WT                                   | p.L1574P, p.D2443fs*39                         | p.R465H, p.D527G       |                      |
| <b>DND41</b>            | WT           | WT                                   | p.L1593P, p.D1609V,<br>p.V2444fs*35            | WT                     |                      |
| <b>TALL-1</b>           | WT           | WT                                   | WT                                             | WT                     |                      |
| <b>LOUCY</b>            | WT           | WT                                   | WT                                             | WT                     |                      |

RUNX3 mutation status in patient samples is not available.

<sup>†</sup>As determined by western blot analysis.

N/A, Not available

**Supplementary Table 2. Human T-ALL cell lines and primary patient samples are sensitive to AI-10-104 treatment.**

|                | $GI_{50} \pm SEM(\mu M)$ |
|----------------|--------------------------|
| Cell Line      |                          |
| Jurkat         | $8.2 \pm 0.4$            |
| KOTPK1         | $5.9 \pm 0.5$            |
| PRMI8402       | $4.3 \pm 0.4$            |
| MOLT4          | $5.7 \pm 0.3$            |
| PF382          | $5.8 \pm 0.3$            |
| HPB-ALL        | $6.6 \pm 0.5$            |
| DND-41         | $5.2 \pm 0.5$            |
| TALL-1         | $7.0 \pm 0.5$            |
| LOUCY*         | $11.0 \pm 1.1$           |
| Average        | 6.1                      |
| Patient sample |                          |
| Diagnostic     |                          |
| TALL-X-1       | $0.9 \pm 0.1$            |
| TALL-X-2       | $2.8 \pm 0.6$            |
| TALL-X-3       | $1.1 \pm 0.1$            |
| TALL-X-4       | $4.3 \pm 6.2$            |
| TALL-X-5       | $4.4 \pm 1.0$            |
| TALL-X-7       | $0.7 \pm 0.1$            |
| TALL-X-8       | $2.7 \pm 0.8$            |
| TALL-X-9       | $0.9 \pm 0.1$            |
| Relapsed       |                          |
| TALL-X-13      | $1.3 \pm 0.1$            |
| TALL-X-14      | $3.0 \pm 0.5$            |
| TALL-X-15      | $4.3 \pm 0.8$            |
| Average        | 2.4                      |

$GI_{50}$  values of the inhibitor are shown for each cell line and patient sample analyzed 2 or 3 times.

\* $GI_{50}$  of LOUCY cell line is excluded from the average of  $GI_{50}$ .



**Supplementary Table 3. qPCR primers for mouse genes analyzed in Figure 3**

| <b>Gene symbol</b> | <b>Direction</b> | <b>Primer sequence (5' to 3')</b> |
|--------------------|------------------|-----------------------------------|
| <i>Actin</i>       | For              | CGAGGCCCAAGAGCAAGAGAG             |
|                    | Rev              | CGGTTGGCCTTAGGGTTCAG              |
| <i>Runx1</i>       | For              | GCCATGAAGAACCAGGTAGC              |
|                    | Rev              | GCCGTCCACTGTGATTTTG               |
| <i>Cxcr4</i>       | For              | GAAGTGGGTTCTGGAGACTAT             |
|                    | Rev              | TTGCCGACTATGCCAGTCAAG             |
| <i>Bcl2</i>        | For              | ATGCCTTTGTGGAAGTATATGGC           |
|                    | Rev              | GGTATGCACCCAGAGTGATGC             |
| <i>Cd4</i>         | For              | TCCTAGCTGTCACTCAAGGGA             |
|                    | Rev              | TCAGAGAAGTCCAGGTGAAGA             |
| <i>Cdkn1a</i>      | For              | CCTGGTGATGTCCGACCTG               |
|                    | Rev              | CCATGAGCGCATCGCAATC               |
| <i>Cdk6</i>        | For              | GGCGTACCCACAGAAACCATA             |
|                    | Rev              | AGGTAAGGGCCATCTGAAAAC             |
| <i>Myb</i>         | For              | GAGCACCCAAGTGTCTC                 |
|                    | Rev              | CACCAGGGGCCTGTTCTTAG              |
| <i>Gata3</i>       | For              | GAAGGCATCCAGACCCGAAAC             |
|                    | Rev              | ACCCATGGCGGTGACCATGC              |
| <i>Notch1</i>      | For              | CCCTTGCTCTGCCTAACGC               |
|                    | Rev              | GGAGTCCTGGCATCGTTGG               |
| <i>Myc</i>         | For              | TCTGTGGAGAAGAGGCAAACCC            |
|                    | Rev              | TAGTTGTGCTGGTGTGAGTGGAGACG        |
| <i>Ii7r</i>        | For              | GCGGACGATCACTCCTTCTG              |
|                    | Rev              | AGCCCCACATATTTGAAATTCCA           |
| <i>Hes1</i>        | For              | AAGACGGCCTCTGAGCACA               |
|                    | Rev              | CCTTCGCCTCTTCTCCATGAT             |
| <i>Dtx1</i>        | For              | TGCCTGGTGGCCATGTACTC              |
|                    | Rev              | GCACTGCAGGCTGCCATCC               |
| <i>Igf1r</i>       | For              | CATGTGCTGGCAGTATAACCC             |
|                    | Rev              | CCACAGGATACAGGCAGCTAT             |
| <i>Tasp1</i>       | For              | TGCTGCTAAAGTAACAGTCAAGG           |
|                    | Rev              | TGACAAGCTCGTTTGCATACA             |

**Supplementary Table 4. shRNA clones used in the study**

| <b>shRNA clone</b> | <b>Clone ID</b> | <b>Target gene</b>           |
|--------------------|-----------------|------------------------------|
| shRUNX1 #1         | TRCN0000013659  | <i>RUNX1</i>                 |
| shRUNX1 #2         | TRCN0000013660  | <i>RUNX1</i>                 |
| shRUNX3 #1         | TRCN0000235675  | <i>RUNX3</i>                 |
| shRUNX3 #2         | TRCN0000235674  | <i>RUNX3</i>                 |
| shCBF $\beta$ #1   | TRCN0000016644  | <i>CBF<math>\beta</math></i> |
| shCBF $\beta$ #2   | TRCN0000016645  | <i>CBF<math>\beta</math></i> |

**Supplementary Table 5. qPCR primers for human genes analyzed in Supplementary Figure 2F**

| <b>Gene symbol</b> | <b>Direction</b> | <b>Primer sequence (5' to 3')</b> |
|--------------------|------------------|-----------------------------------|
| <i>GAPDH</i>       | For              | CTCCTCTGACTTCAACAGCGACAC          |
|                    | Rev              | TGCTGTAGCCAAATTCGTTGTCAT          |
| <i>RPS9</i>        | For              | TGTCGCAAACTTATGTGACCC             |
|                    | Rev              | TCCAGACCTCACGTTTGTTC              |
| <i>RUNX1</i>       | For              | CCAATACCTGGGATCCATTGC             |
|                    | Rev              | CTGGCACGTCCAGGTGAAA               |
| <i>RUNX3</i>       | For              | AGGCAATGACGAGAACTACTCC            |
|                    | Rev              | CGAAGGTCGTTGAACCTGG               |
| <i>CXCR4</i>       | For              | GGGCAATGGATTGGTCATCCT             |
|                    | Rev              | TGCAGCCTGTA CTTGTCCG              |
| <i>CD4</i>         | For              | GTCCCAAAGGCTTCTTCTTGAG            |
|                    | Rev              | GGAAATCAGGGCTCCTTCTTAAC           |
| <i>MYB</i>         | For              | TGTTGCATGGATCCTGTGT               |
|                    | Rev              | AGTTCAGTGCTGGCCATCTT              |
| <i>GATA3</i>       | For              | TTCAGTTGGCCTAAGGTGGT              |
|                    | Rev              | CGCCGGACTCTTAGAAGCTA              |
| <i>CDK6</i>        | For              | CAGATGGCTCTAACCTCAGTGG            |
|                    | Rev              | CACGAAAAAGAGGCTTTCTACGA           |
| <i>MYC</i>         | For              | GCAGCTGCTTAGACGCTGGATTTT          |
|                    | Rev              | GCAGCAGCTCGAATTTCTTCCAGA          |
| <i>IL7R</i>        | For              | CCTTCCCGATAGACGACACTC             |
|                    | Rev              | CCCTCGTGGAGGTAAAGTGC              |
| <i>HES1</i>        | For              | GAGAGGCGGCTAAGGTGTTTG             |
|                    | Rev              | CTGGTGTAGACGGGGATGAC              |
| <i>DTX1</i>        | For              | TGGTCACAGCATCAGGCTAC              |
|                    | Rev              | TGGTCTGGGTATCAGGGAAG              |
| <i>IGF1R</i>       | For              | ATGCTGACCTCTGTTACCTCT             |
|                    | Rev              | GGCTTATTCCCACAATGTAGTT            |
| <i>TASP1</i>       | For              | AGGCACTTTGGACACGGTAG              |
|                    | Rev              | GCTGTGGAGTAGGGGTTATGAG            |

**Supplementary Table 6. Primers for ChIP-qPCR**

| <b>Target locus</b>        | <b>Direction</b> | <b>Primer sequence (5' to 3')</b> |
|----------------------------|------------------|-----------------------------------|
| ChIP-mNMe                  | For              | AACCCTGAACCTGGTGATTG              |
|                            | Rev              | AGTGCTGGTGCCAAGAACTC              |
| ChIP-mNMe H                | For              | CCCAACGTATTCCTCAACTGC             |
|                            | Rev              | AATGAAGTCACCTGCCCACT              |
| ChIP-mMyb+15               | For              | CTGTGTCTGGGGAAGGGGGT              |
|                            | Rev              | TCTTGCCTCCAACAGCATCT              |
| ChIP-mMyb-92               | For              | TGGTTTCCAGGGACCGTTAG              |
|                            | Rev              | GCAAACCACAGAGACTTGCA              |
| ChIP-mMyb-92 H             | For              | TGGATCCACTGAGCAGAACA              |
|                            | Rev              | TGGCTTCCCTACTGAGCTGT              |
| N.control<br>(Gene desert) | For              | AACCTCACACACAACAAGCTG             |
|                            | Rev              | TGTGATAGGGAGAATGCTTGC             |
| ChIP-mHes1pro              | For              | GACCTTGTGCCTAGCGGCCA              |
|                            | Rev              | AGACAGGGGATTCCGCTGTT              |

**Supplementary Table 7. Primers for ATAC-qPCR**

| <b>Target Locus</b> | <b>Direction</b> | <b>Primer sequence (5' to 3')</b> |
|---------------------|------------------|-----------------------------------|
| mNMe                | For              | AGAGGAGTTCTTGGCACCAG              |
|                     | Rev              | TTAGGCAGACTGCAGGGAAC              |
| Gene Desert 1       | For              | AACCTCACACACAACAAGCTG             |
|                     | Rev              | TGTGATAGGGAGAATGCTTGC             |
| Gene Desert 2       | For              | GCTACAAAAGAGTGAGGTCGT             |
|                     | Rev              | TTCCTACCCAGAAGTGTGCC              |

## Supplementary Figure Legends

**Supplementary Figure 1. Mice that develop disease derive from T-ALL subclones that retain the floxed *Runx1* allele and Cre activation has no significant effects on mouse T-ALL growth *in vivo* or *in vitro*.** (A) For the control samples, genomic DNA was isolated from tail biopsies of wild type, *Runx1*<sup>f/+</sup> and *Runx1*<sup>f/f</sup> mice (designated WT, F/+ and F/F). For the deleted control, DNA was isolated from mouse T-ALL cell line 1143 derived from a leukemic *Tal1/Lmo2/Rosa26-CreER<sup>T2</sup>Runx1*<sup>f/f</sup> mouse that was treated with 4-OHT *in vitro* for 48h (designated F/Δ). Analysis of primary mouse T-ALL 7714 reveals a *Tal1/Lmo2/Rosa26-CreER<sup>T2</sup>Runx1*<sup>f/Δ</sup> genotype likely due to leaky Cre expression in the primary tumor. DNA was isolated from untreated mouse T-ALL 7714 cells (UN) and from tumor tissue isolated from transplanted mice at time of sacrifice. V1 and V2 refers to tumor DNA isolated from 2 independent vehicle treated mice transplanted with mouse T-ALL 7714 cells. WT band likely reflects presence of normal cells in tumor specimen. T1 and T2: Tumor DNA isolated from 2 independent tamoxifen treated mice transplanted with mouse T-ALL 7714 cells. These tamoxifen treated mice succumb to disease and select for leukemic clones that retain the floxed *Runx1* allele. M indicates DNA ladder used to estimate fragment size. (B) Mouse T-ALL cells from *Tal1/Lmo2/Rosa26-CreER<sup>T2</sup>* mice were transplanted into mice and one a week later tamoxifen was administered for 3 days. The survival curve for 3 mouse T-ALLs (1353, 4456 and 2716) was estimated using the Kaplan-Meier method. (C) The 2 independent *Tal1/Lmo2/Rosa26-CreER<sup>T2</sup>* mouse T-ALL cells were treated with vehicle (EtOH) or 4-OHT and the apoptotic cells determined by Annexin V-FITC and 7AAD staining followed by flow cytometry. The averages of 3 to 4 independent experiments are shown as means ± SD.

**Supplementary Figure 2. RUNX protein expression in mouse T-ALL cells and T-ALL patient samples and *RUNX1* knockdown in human T-ALL cell lines alters the expression of a subset of *RUNX1*-, *TAL1*-, and *NOTCH1*-regulated genes resulting in cell apoptosis.** (A) *RUNX1* and *RUNX3* expression levels in mouse thymus and *Tal1/Lmo2* mouse T-ALL cell lines were analyzed by immunoblotting. ERK1/2 was used as a loading control. (B) *RUNX1* and *RUNX3* expression in Jurkat, KOPTK1 and eight T-ALL patient samples were analyzed by immunoblotting. ERK1/2 was used as a loading control. (C) Quantification of apoptotic leukemia cells upon *RUNX1* knockdown in KOPTK1, PF382, and RPMI8402 human T-ALL cells. 3-4 independent experiments were performed and shown as mean ± SEM. (D) *RUNX1* mRNA levels in KOPTK1, PF382, and RPMI8402 cells transduced with control (GFP) or *RUNX1*-specific shRNAs was measured by qRT-PCR. *RPS9* or *GAPDH* were used for normalization. Three independent experiments were performed. (E) CD4 cell surface expression was determined by flow cytometry after staining with CD4 antibody. Representative flow data is shown and data from 3 independent experiments are shown as MFI ± SD (right). (F) Jurkat cells were infected with lentiviruses expressing shRNAs against *RUNX1* or GFP. RNA was isolated 4 days after infection. Gene expression changes upon *RUNX1* knockdown were determined by qRT-PCR. *GAPDH* was used for normalization of qPCR values. 3-4 independent experiments were performed and data are shown as mean ± SEM (\*p<0.05, \*\*p<0.005, \*\*\*p<0.0005, \*\*\*\*p<0.0001, One-way ANOVA multiple comparisons test).

**Supplementary Figure 3. MYB is required for *Tal1/Lmo2* mouse T-ALL growth *in vivo* and *in vitro*.** (A) Four independent murine *Tal1/Lmo2* T-ALL cells (5059, 5109, 4673 and 6124) were infected with retroviruses encoding an shRNA to *Myb* or *Renilla luciferase*. Cells were sorted for GFP expression, transplanted into syngeneic recipients and monitored for evidence of disease. The survival curve for each group of mice was estimated using the Kaplan-Meier method and the difference in overall survival between the two groups assessed by the log-rank test (5059: n=12 mice, 5109: n=9 mice, 4673: n=9, 6125: n=9). (B) MYB suppression impairs

leukemic growth *in vitro* but not all mouse T-ALLs. Cell viability of the mouse T-ALL cell lines (5059, 5109 and 6124) transduced with *Renilla luciferase* or *Myb* shRNAs was calculated via a trypan blue exclusion assay. *Myb* suppression in murine *Tal1/Lmo2* 6124 T-ALL cells failed to suppress leukemic growth *in vitro*. (C) MYB protein level in leukemic cells was determined by immunoblotting. ERK1/2 protein levels were used for loading control.

**Supplementary Figure 4. *Runx1* depletion has no effect on intracellular NOTCH1 binding to the *Hes1* promoter or to gene desert regions.** (A) *Runx1* deletion did not change the recruitment of intracellular NOTCH1 or H3K27ac to mouse *Hes1* promoter. (B) *Runx1* deletion has no effect on TAL1, NOTCH1 or H3K27ac binding to gene desert region. 2-4 independent experiments were performed and data is shown as mean  $\pm$  SEM.

**Supplementary Figure 5. RUNX3 does not bind to *MYC* and *MYB* enhancer loci and either support cell survival in Jurkat cells.** (A) Apoptotic leukemic cells upon *RUNX3* knockdown in Jurkat, RPMI8402 human T-ALL cells were determined by Annexin V-FITC/7-AAD staining followed by flow cytometry. (B) *RUNX3* mRNA levels in Jurkat and RPMI8402 cells transduced with control (GFP) or *RUNX3*-specific shRNA were measured by qRT-PCR. RPS9 was used for normalization. (C) *RUNX1* and *RUNX3* binding at *N-Me*, *MYB* +14-kb and *MYB* -93-kb loci in Jurkat cells was determined using ChIP-qPCR. 3-5 independent experiments were performed and shown as mean  $\pm$  SEM (\* $p$ <0.05, \*\*\* $p$ <0.0005, \*\*\*\* $p$ <0.0001, Two-way ANOVA multiple comparisons test).

**Supplementary Figure 6. Treatment with the RUNX-CBF $\beta$  inhibitor but not the inactive analogue induces apoptosis of human T-ALL cell lines while maintaining the viability of human bone marrow cells.** (A) Protein was isolated from AI-10-104 treated KOPTK1 cells and *RUNX1*, *RUNX3*, and CBF $\beta$  expression levels were determined by immunoblotting. GAPDH was used as loading control. (B) Seven human T-ALL cell lines were treated with increasing concentrations of AI-10-104 (2.5-10 $\mu$ M) or 10 $\mu$ M of the inactive analogue AI-4-88 for 6 days and apoptotic cells were determined by Annexin V-FITC and 7AAD staining followed by flow cytometry. The results are the means of 2 to 3 independent replicates and error bars represent SEM (\* $p$ <0.05, \*\* $p$ <0.005, \*\*\* $p$ <0.0005, Two-way ANOVA multiple comparisons test). (C) Human T-ALL cell lines and T-ALL patient samples were treated with increasing concentrations of the inactive analogue AI-4-88 (1-20 $\mu$ M) for 3 days. Cell growth/metabolism were analyzed by MTS assay. (D) *MYC* and *MYB* gene expression changes were determined in RPMI8402 cells treated with 10 $\mu$ M of AI-4-88 or AI-10-104 for 12 hours. The results are the means of 3 independent replicates and error bars represent SEM (\*\* $p$ <0.005, Student *t* test). (E) Randomly selected patient samples (n=3) were treated with 10 $\mu$ M of AI-4-88 or 5, 10 $\mu$ M of AI-10-104 for 6 days. Apoptotic cells were determined by Annexin V-FITC and 7AAD staining followed by flow cytometry. Three independent replicates are shown as mean  $\pm$  SEM (\* $p$ <0.05, \*\*\* $p$ <0.0005, ANOVA multiple comparisons test). (F) G-CSF mobilized normal human BM cells were treated with increasing concentrations of AI-10-104 for 3 days and effects on cell growth/metabolism were determined by MTS assay. GI<sub>50</sub> of each donor cells was calculated using Graph Pad Prism 7 software.
